# Supplementary material for: New triorganotin(iv) compounds with aromatic carboxylate ligands: synthesis and evaluation of the pro-apoptotic mechanism
Source: Royal Society of Chemistry journal article supplement (doi:10.1039/d0ra06695h), 2021-01-01
Supplement: d0ra06695h1.pdf [file d0ra06695h1.pdf]

**Supporting information**

**New Triorganotin(IV) Compounds with Aromatic Carboxylate Ligands: Synthesis and  
Evaluation of Pro-apoptotic Mechanism**

Faisal Rashid<sup>a, #</sup>, Noor Uddin<sup>b, #</sup>, Saqib Ali<sup>b\*</sup>, Ali Haider<sup>b, \*</sup>, Syed Ahmad Tirmizi<sup>b</sup>, Jamshed  
Iqbal<sup>a,\*</sup>

*<sup>a</sup>Centre for Advanced Drug Research COMSATS University Islamabad, Abbottabad Campus,  
Abbottabad-22060, Pakistan*

*<sup>b</sup>Department of Chemistry, Quaid-i-Azam University, Islamabad, Pakistan*

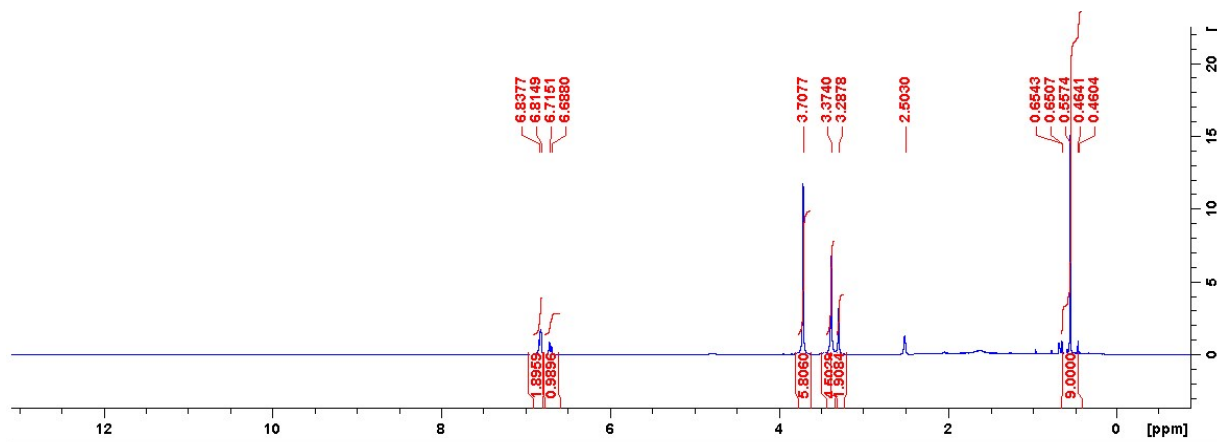

(a)

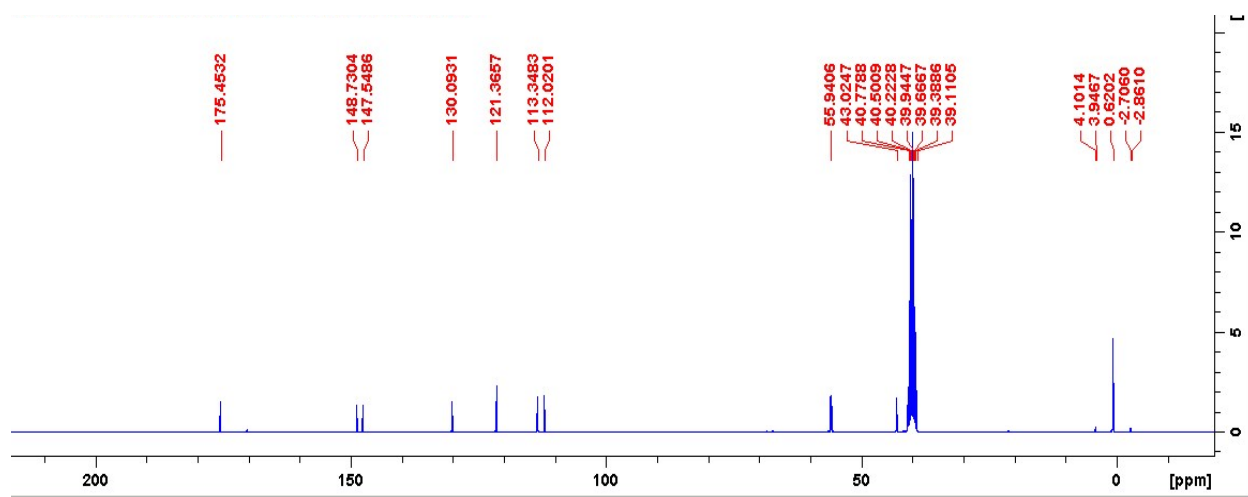

(b)

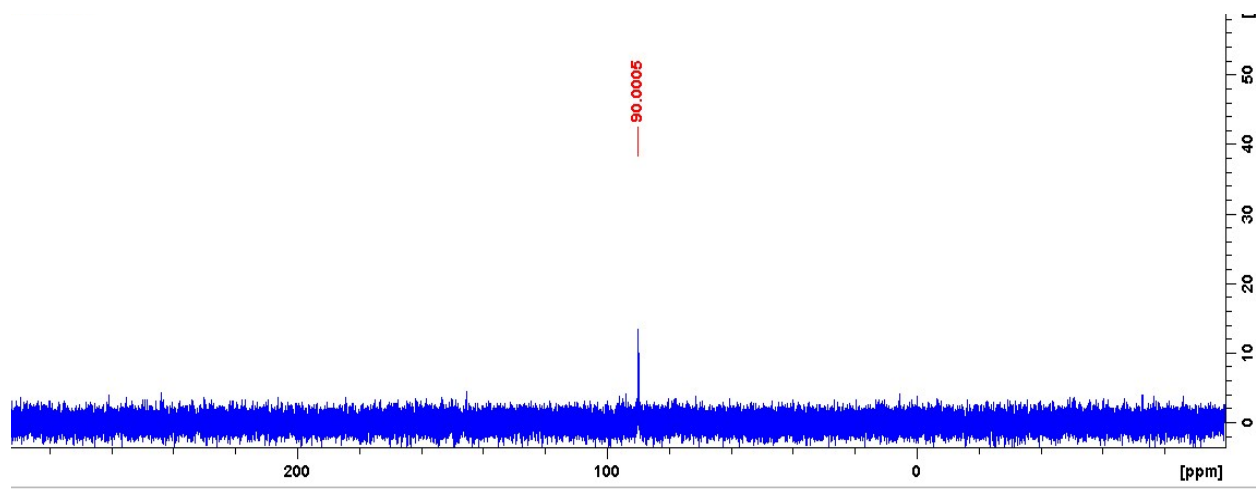

(c)

Fig. S1. Multinuclear (a) <sup>1</sup>H-, (b) <sup>13</sup>C- and (c) <sup>119</sup>Sn-NMR spectra of C1

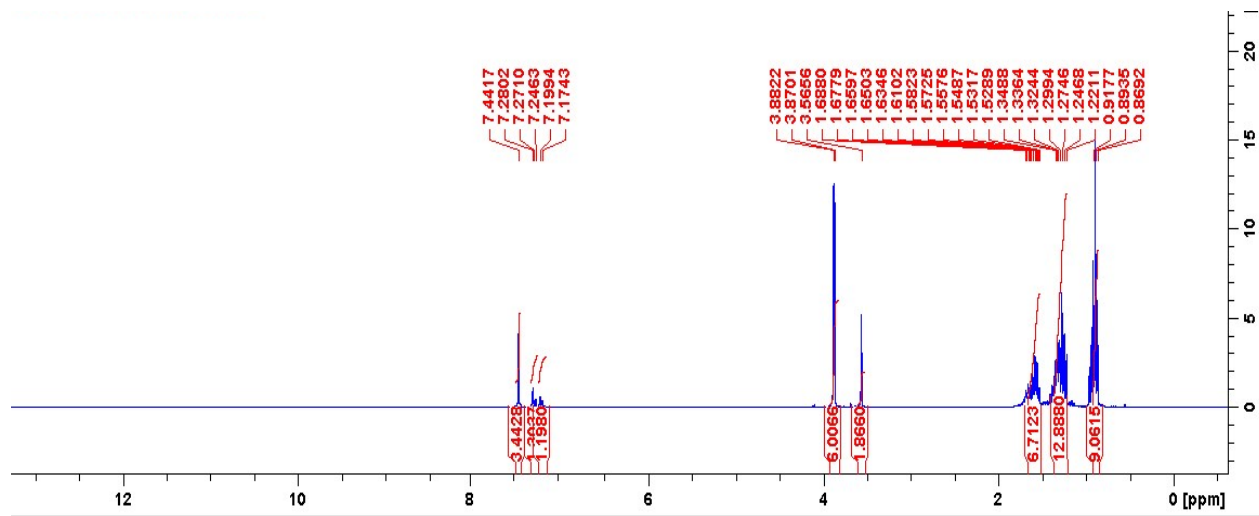

(a)

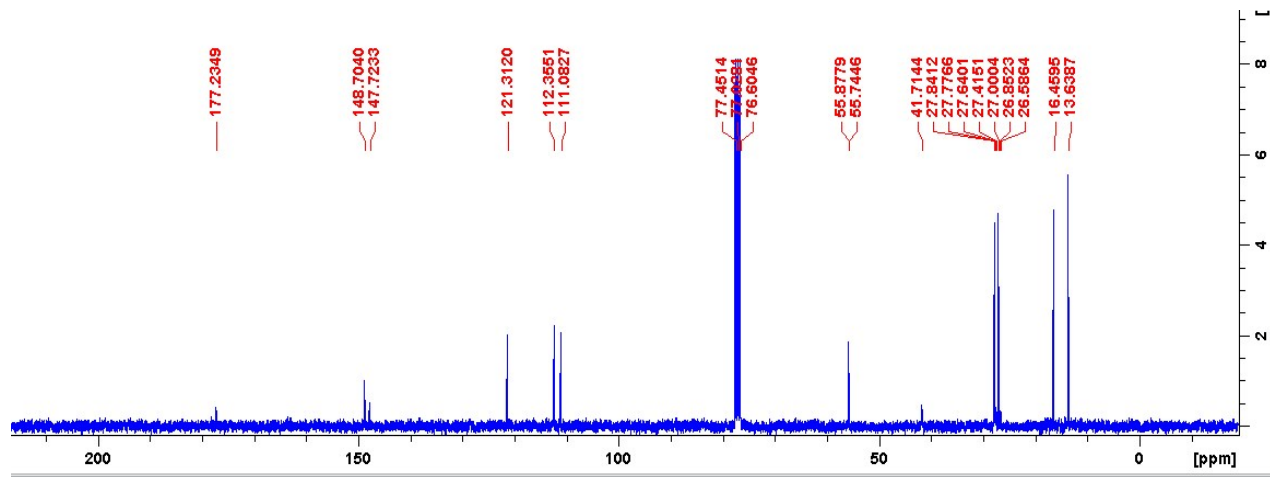

(b)

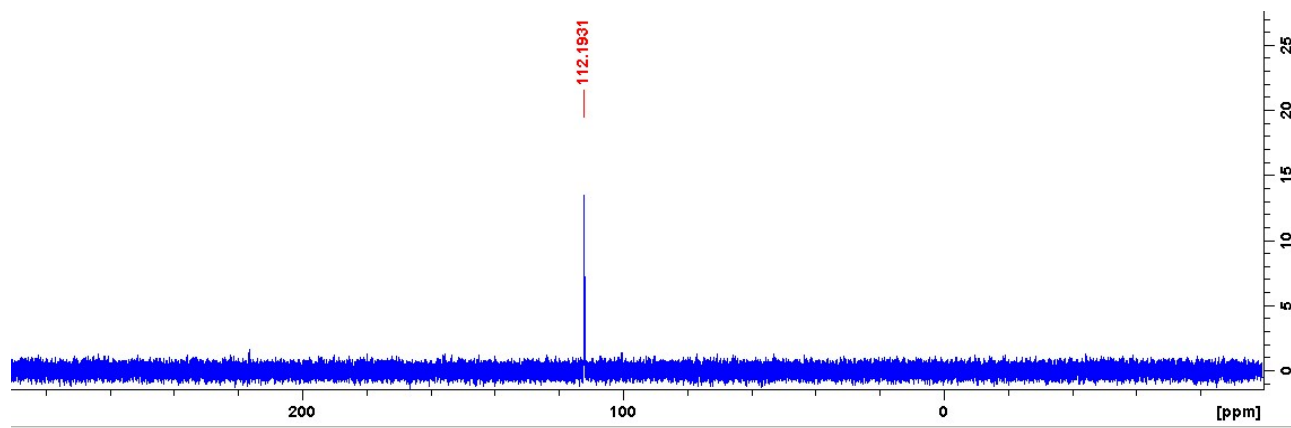

(c)

Fig. S2. Multinuclear (a)  $^1\text{H}$ - , (b)  $^{13}\text{C}$ - and (c)  $^{119}\text{Sn}$ -NMR spectra of C2

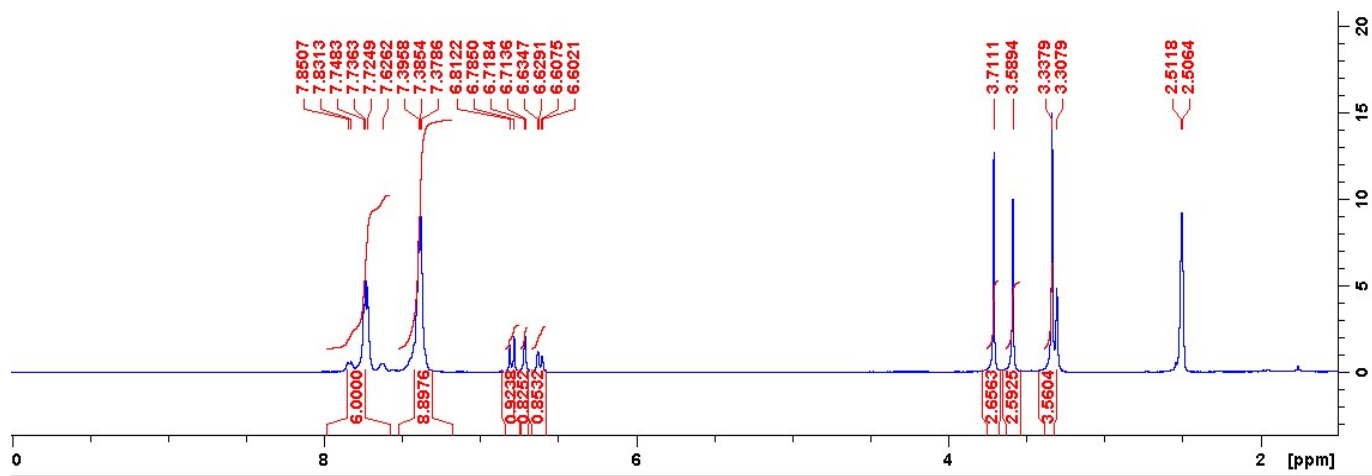

(a)

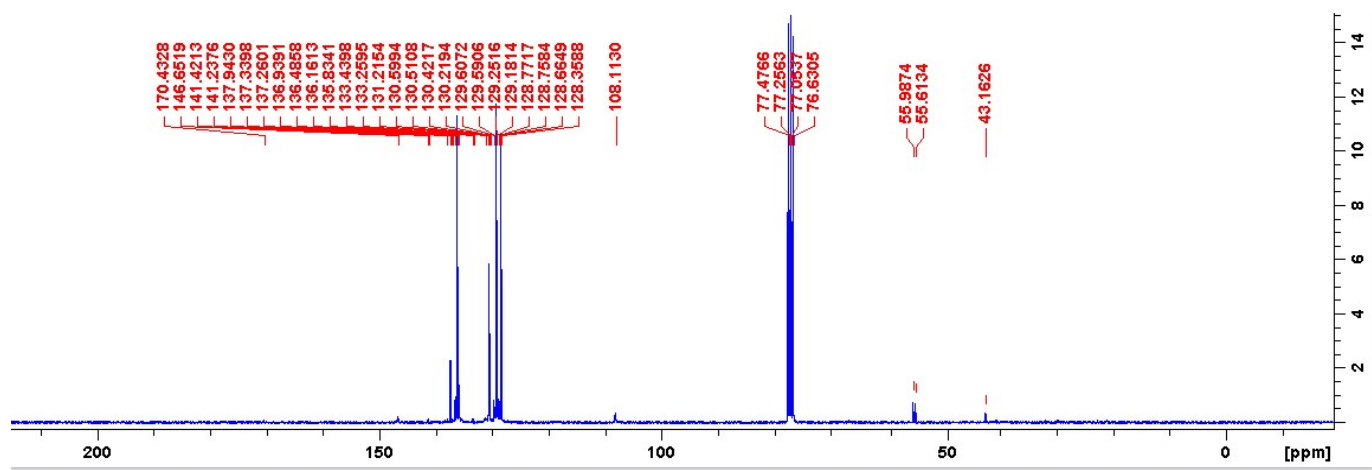

(b)

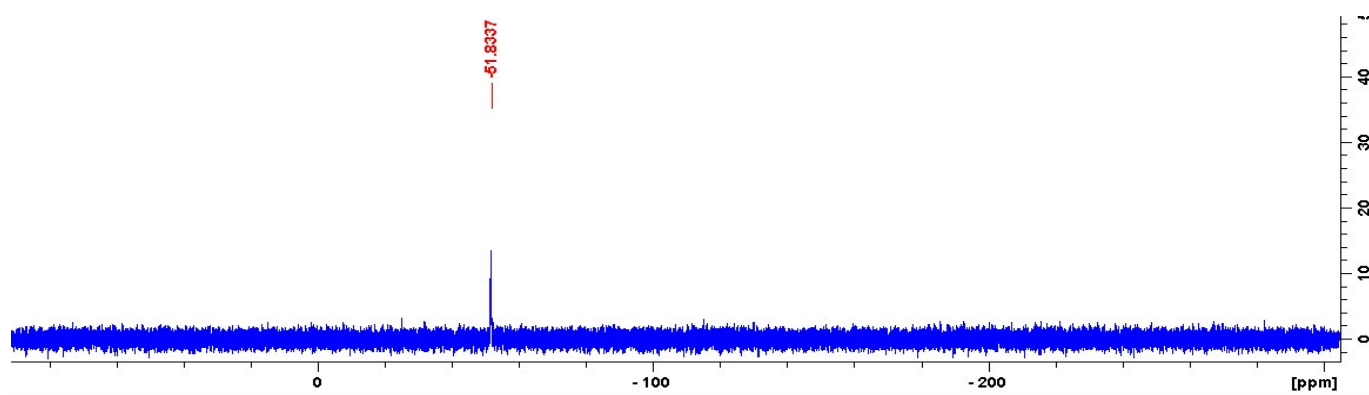

(c)

Fig. S3. Multinuclear (a)  $^1\text{H}$ -, (b)  $^{13}\text{C}$ - and (c)  $^{119}\text{Sn}$ -NMR spectra of C3

**Table S1.** Crystal data and refinement parameter for complex **1**.

| <b>Crystal data</b>                         | <b>1</b>                                                       |
|---------------------------------------------|----------------------------------------------------------------|
| Empirical formula                           | C <sub>22</sub> H <sub>38</sub> O <sub>4</sub> Sn              |
| Formula weight                              | 485.21                                                         |
| Temperature/K                               | 100(2)                                                         |
| Crystal system                              | Monoclinic                                                     |
| Space group                                 | P2 <sub>1</sub> /c                                             |
| a/Å                                         | 26.639(3)                                                      |
| b/Å                                         | 10.7495(11)                                                    |
| c/Å                                         | 16.3176(16)                                                    |
| $\alpha$ /°                                 | 90                                                             |
| $\beta$ /°                                  | 98.1189(16)                                                    |
| $\gamma$ /°                                 | 90                                                             |
| Volume/Å <sup>3</sup>                       | 4625.8(8)                                                      |
| Z                                           | 8                                                              |
| $\rho_{\text{calc}}$ /cm <sup>3</sup>       | 1.393                                                          |
| $\mu$ /mm <sup>-1</sup>                     | 1.127                                                          |
| F(000)                                      | 2016.0                                                         |
| Crystal size/mm <sup>3</sup>                | .3 × .2 × .1                                                   |
| Radiation                                   | MoK $\alpha$ ( $\lambda$ = 0.71073)                            |
| 2 $\Theta$ range for data collection/°      | 3.088 to 61.814                                                |
| Index ranges                                | -37 ≤ h ≤ 38, -15 ≤ k ≤ 15, -23 ≤ l ≤ 22                       |
| Reflections collected                       | 60460                                                          |
| Independent reflections                     | 13595 [R <sub>int</sub> = 0.0280, R <sub>sigma</sub> = 0.0257] |
| Data/restraints/parameters                  | 13595/0/497                                                    |
| Goodness-of-fit on F <sup>2</sup>           | 1.214                                                          |
| Final R indexes [I ≥ 2 $\sigma$ (I)]        | R <sub>1</sub> = 0.0574, wR <sub>2</sub> = 0.1271              |
| Final R indexes [all data]                  | R <sub>1</sub> = 0.0759, wR <sub>2</sub> = 0.1396              |
| Largest diff. peak/hole / e Å <sup>-3</sup> | 5.34/-1.90                                                     |
